# Supplementary material
Source: PubMed Central journal article supplement (PMC5027642)
Supplement: sc6b01329_si_001.pdf [file sc6b01329_si_001.pdf]

# Supporting information

## Characterization and Comparison of Fast Pyrolysis Bio-oils from Pinewood, Rapeseed Cake, and Wheat Straw Using $^{13}\text{C}$ NMR and Comprehensive GC $\times$ GC

*Leila Negahdar<sup>†</sup>, Arturo Gonzalez-Quiroga<sup>‡</sup>, Daria Otyuskaya<sup>‡</sup>, Hilal E. Toraman<sup>‡</sup>, Li Liu<sup>‡,§</sup>, Johann T. B. H. Jastrzebski<sup>†</sup>, Kevin. M. Van Geem<sup>‡</sup>, Guy B. Marin<sup>‡</sup>, Joris W. Thybaut<sup>‡</sup> and Bert M. Weckhuysen<sup>†\*</sup>*

<sup>†</sup> Inorganic Chemistry and Catalysis, Debye Institute for Nanomaterials Science, Utrecht University, Universiteitsweg 99, 3584 CG Utrecht, The Netherlands

<sup>‡</sup> Laboratory for Chemical Technology, Ghent University, Technologiepark 914, 9052 Ghent, Belgium

<sup>§</sup> School of Energy Science and Engineering, Harbin Institute of Technology, 92 West Dazhi Street, Harbin, Heilongjiang, 150001, P.R. China

\* E-mail: B.M.Weckhuysen@uu.nl

Pages: S1-S12

Table: Table S1

**Table S1.** List of identified compounds and detailed composition of the bio-oils (wt. %) obtained via a GC×GC-FID/TOF-MS analytical approach. M: molecular mass.

| <b>M</b><br>[g mol <sup>-1</sup> ] | <b>Compound</b>                        | <b>Pinewood<br/>bio-oil</b><br>[wt. %] | <b>Wheat<br/>straw<br/>bio-oil</b><br>[wt. %] | <b>Rapes<br/>eed<br/>cake<br/>bio-oil</b><br>[wt.<br>%] | <b>Refer<br/>ences</b> |
|------------------------------------|----------------------------------------|----------------------------------------|-----------------------------------------------|---------------------------------------------------------|------------------------|
| <b>Non-aromatic compounds</b>      |                                        |                                        |                                               |                                                         |                        |
| <b>Alcohols</b>                    |                                        |                                        |                                               |                                                         |                        |
| <b>58</b>                          | 2-propenol (allyl alcohol)             | 0.24                                   |                                               |                                                         | 5                      |
| <b>58</b>                          | 2-propen-1-ol                          |                                        | 0.18                                          |                                                         | 14                     |
| <b>72</b>                          | Cyclobutanol                           |                                        | 0.07                                          |                                                         |                        |
| <b>118</b>                         | 1,2,3-cyclopentanetriol                |                                        | 0.05                                          |                                                         |                        |
| <b>184</b>                         | Z-2-dodecenol                          |                                        | 0.003                                         |                                                         |                        |
| <b>184</b>                         | Z-4-dodecenol                          |                                        |                                               | 0.05                                                    |                        |
| <b>184</b>                         | Z-8-dodecen-1-ol                       |                                        |                                               | 0.26                                                    |                        |
| <b>212</b>                         | 3-isopropyl-4-methyl-dec-1-en-4-ol     | 0.03                                   |                                               |                                                         | 5                      |
| <b>244</b>                         | 1,15-pentadecanediol                   |                                        | 0.02                                          |                                                         |                        |
| <b>297</b>                         | 3,7,11,15-tetramethyl-2-hexadecen-1-ol |                                        | 0.004                                         |                                                         |                        |
| <b><u>Total</u></b>                |                                        | <b><u>0.27</u></b>                     | <b><u>0.32</u></b>                            | <b><u>0.30</u></b>                                      |                        |
| <b>Carboxylic acids</b>            |                                        |                                        |                                               |                                                         |                        |
| <b>60</b>                          | acetic acid                            | 4.58                                   | 3.79                                          |                                                         | 5, 14                  |
| <b>74</b>                          | propionic acid                         | 0.23                                   | 0.36                                          |                                                         | 5, 14                  |
| <b>86</b>                          | 3-butenic acid                         | 0.05                                   | 0.03                                          |                                                         |                        |
| <b>88</b>                          | butyric acid                           | 0.04                                   | 0.11                                          | 0.14                                                    | 5                      |
| <b>88</b>                          | 2-methyl-propanoic (isobutyric) acid   | 0.006                                  |                                               |                                                         | 5, 14                  |

|                     |                                         |                    |                    |                    |           |
|---------------------|-----------------------------------------|--------------------|--------------------|--------------------|-----------|
| <b>100</b>          | 2-methylcyclopropanecarboxylic acid     |                    | 0.004              |                    |           |
| <b>104</b>          | 4-hydroxybutyric acid                   |                    | 0.41               | 0.74               | 5         |
| <b>128</b>          | 3-heptenoic acid                        |                    | 0.01               |                    |           |
| <b>130</b>          | heptanoic acid                          |                    | 0.01               |                    |           |
| <b>144</b>          | octanoic acid                           |                    | 0.02               |                    |           |
| <b>214</b>          | tridecanoic acid                        |                    | 0.01               |                    |           |
| <b>228</b>          | tetradecanoic acid                      |                    |                    | 0.05               |           |
| <b>240</b>          | Z-8-methyl-9-tetradecenoic acid         |                    | 0.04               |                    |           |
| <b>256</b>          | hexadecanoic (palmitic) acid            |                    | 0.05               | 0.07               | 26        |
| <b>284</b>          | octadecanoic (stearic) acid             |                    | 0.01               |                    |           |
| <b><u>Total</u></b> |                                         | <b><u>4.90</u></b> | <b><u>4.85</u></b> | <b><u>0.10</u></b> |           |
| <b>Aldehydes</b>    |                                         |                    |                    |                    |           |
| <b>44</b>           | Acetaldehyde                            | 0.57               | 0.16               |                    | 5, 14     |
| <b>60</b>           | Glycolaldehyde (hydroxyacetaldehyde)    | 2.03               | 1.14               |                    | 5, 14     |
| <b>90</b>           | 2,3-dihydroxy-propanal (glyceraldehyde) | 0.08               | 0.17               |                    | 5, 14     |
| <b>100</b>          | 1,5-pentanedial (glutaraldehyde)        | 0.15               |                    |                    | 5, 14     |
| <b>210</b>          | E-12-tetradecenal                       |                    |                    | 0.09               |           |
| <b>252</b>          | 3-heptadecenal                          |                    | 0.01               |                    |           |
| <b><u>Total</u></b> |                                         | <b><u>2.82</u></b> | <b><u>1.48</u></b> | <b><u>0.09</u></b> |           |
| <b>Ketones</b>      |                                         |                    |                    |                    |           |
| <b>58</b>           | Acetone                                 | 0.24               | 0.15               |                    | 5, 14     |
| <b>72</b>           | 2-butanone                              | 0.15               |                    |                    |           |
| <b>74</b>           | 1-hydroxy-2-propanone (acetol)          | 1.354              | 2.72               |                    | 5, 14     |
| <b>82</b>           | 2-cyclopenten-1-one                     | 0.05               | 0.19               |                    | 5, 14, 39 |
| <b>88</b>           | 1-hydroxy-2-butanone                    |                    | 0.48               |                    | 5, 14, 39 |

|               |                                        |                    |                    |                    |
|---------------|----------------------------------------|--------------------|--------------------|--------------------|
| 96            | 2-methyl-2-cyclopenten-1-one           | 0.05               | 0.10               | 5, 14              |
| 96            | 2-cyclohexen-1-one                     |                    | 0.01               | 5, 39              |
| 96            | 1-(2-methylidenecyclopropyl)ethanone   |                    |                    | 0.05               |
| 98            | 1,2-cyclopentanedione                  | 0.05               |                    | 5                  |
| 98            | 2-hydroxy-2-cyclopenten-1-one          |                    | 0.01               | 5, 14, 39          |
| 102           | 1-hydroxy-3-methyl-2-butanone          |                    | 0.02               | 5                  |
| 110           | 2,3-dimethyl-2-cyclopenten-1-one       | 0.03               | 0.08               | 5, 14              |
| 110           | 2-cyclohexene-1,4-dione                |                    | 0.04               | 5                  |
| 110           | 3-ethyl-2-cyclopenten-1-one            |                    | 0.04               | 5                  |
| 110           | 3,4-dimethyl-2-cyclopenten-1-one       |                    | 0.02               | 5, 14              |
| 112           | 2-hydroxy-3-methyl-2-cyclopenten-1-one | 0.33               | 0.55               | 5, 14, 39          |
| 112           | 3-methyl-1,2-cyclopentanedione         |                    | 0.03               | 5                  |
| 112           | 1-cyclopentyl-ethanone                 |                    | 0.02               |                    |
| 114           | 2,5-hexanedione                        |                    | 0.03               | 5                  |
| 114           | 3-hydroxy-cyclohexanone                |                    | 0.02               | 5                  |
| 116           | 1-(acetyloxy)-2-propanone              | 0.05               | 0.12               | 5, 14              |
| 124           | 2-ethylidenecyclohexanone              |                    | 0.02               |                    |
| 126           | 3-ethyl-2-hydroxy-2-cyclopenten-1-one  | 0.05               | 0.15               | 5, 14              |
| 130           | 1-(acetyloxy)-2-Butanone               | 0.05               | 0.04               | 5                  |
| 208           | 6,10-dimethyl-5,9-dodecadien-2-one     |                    | 0.03               |                    |
| 226           | 2-pentadecanone                        |                    | 0.02               |                    |
| 254           | 2-heptadecanone                        |                    | 0.04               |                    |
| 268           | 6,10,14-trimethyl-2-pentadecanone      |                    |                    |                    |
| <b>Total</b>  |                                        | <b><u>2.39</u></b> | <b><u>4.94</u></b> | <b><u>0.05</u></b> |
| <b>Esters</b> |                                        |                    |                    |                    |
| 104           | 1,2-ethanediol, monoacetato            | 0.12               | 0.06               |                    |

|              |                                          |                    |                    |                    |
|--------------|------------------------------------------|--------------------|--------------------|--------------------|
| 144          | 2-ethylbutyl acetate                     | 0.03               |                    |                    |
| 160          | 1,3-propanediol, diacetate               | 0.06               |                    |                    |
| 296          | 11-octadecenoic acid, methyl ester       |                    |                    | 0.72               |
| 296          | trans-13-octadecenoic acid, methyl ester |                    |                    | 0.62               |
| <b>Total</b> |                                          | <b><u>0.21</u></b> | <b><u>0.06</u></b> | <b><u>1.34</u></b> |

### Heterocyclic compounds

#### Furans

|              |                                           |                    |                    |                    |           |
|--------------|-------------------------------------------|--------------------|--------------------|--------------------|-----------|
| 84           | 2(5H)-furanone ( $\gamma$ -crotonolacton) | 0.37               |                    |                    | 5, 39     |
| 84           | 2(3H)-furanone                            | 0.11               |                    |                    | 5         |
| 88           | tetrahydro-2-furanol                      |                    |                    | 0.46               |           |
| 96           | 2-furaldehyde (furfural)                  | 0.24               | 0.14               |                    | 5, 14, 39 |
| 96           | 3-furaldehyde                             | 0.01               | 0.02               |                    | 5, 14     |
| 98           | 4-methyl-2(5H)-furanone                   | 0.14               | 0.08               |                    | 5, 14     |
| 98           | 3-methyl-2(5H)-furanone                   | 0.11               | 0.07               |                    | 5, 14     |
| 98           | 5-methyl-2(5H)-furanone                   | 0.09               | 0.01               |                    | 5, 14, 39 |
| 102          | 4-hydroxydihydro-2(3H)-furanone           | 0.14               |                    |                    | 5         |
| 110          | 5-methyl-2-furaldehyde                    | 0.05               | 0.22               |                    | 5         |
| 110          | 1-(2-furanyl)-ethanone (2-acetyl-furan)   | 0.05               | 0.06               |                    | 5, 14     |
| 112          | 2,5-dihydro-3,5-dimethyl-2-furanone       | 0.04               | 0.04               |                    | 5, 14     |
| 112          | 3-methyl-2,5-furandione                   |                    | 0.02               |                    |           |
| 116          | 5-(hydroxymethyl)dihydrofuran-2(3H)-one   |                    | 0.07               |                    |           |
| 126          | 5-hydroxymethylfurfural                   | 0.22               |                    |                    | 5         |
| 168          | 5-acetoxymethyl-2-furaldehyde             | 0.06               |                    |                    |           |
| <b>Total</b> |                                           | <b><u>1.62</u></b> | <b><u>0.72</u></b> | <b><u>0.46</u></b> |           |

---

**Pyrans**

|              |                                            |                    |                    |       |
|--------------|--------------------------------------------|--------------------|--------------------|-------|
| 96           | 4H-pyran-4-one                             | 0.05               |                    | 5     |
| 112          | 3,4-dihydro-6-methyl-2H-pyran-2-one        | 0.06               |                    |       |
| 126          | 3-hydroxy-2-methyl-4H-pyran-4-one (maltol) | 0.13               | 0.07               | 5, 14 |
| <b>Total</b> |                                            | <b><u>0.24</u></b> | <b><u>0.07</u></b> |       |

**Other heterocyclic compounds**

|              |                                           |                    |                    |  |
|--------------|-------------------------------------------|--------------------|--------------------|--|
| 122          | 2,7-dimethyl-oxepine                      |                    | 0.03               |  |
| 144          | 4-methyl-2-(1-methylpropyl)-1,3-Dioxolane | 0.08               |                    |  |
| 212          | dodecyl-oxirane                           |                    | 0.01               |  |
| <b>Total</b> |                                           | <b><u>0.08</u></b> | <b><u>0.04</u></b> |  |

**Carbohydrates**

|              |                                              |                    |                    |           |
|--------------|----------------------------------------------|--------------------|--------------------|-----------|
| 144          | 1,4:3,6-dianhydro- $\alpha$ -d-glucopyranose | 0.22               | 0.17               | 5, 14     |
| 144          | 2,3-anhydro-d-mannosan                       |                    | 0.24               | 5         |
| 162          | Levoglucosan                                 | 5.58               | 0.66               | 5, 14, 39 |
| 180          | D-allose                                     | 1.25               | 0.17               |           |
| 342          | Sucrose                                      |                    | 0.03               |           |
| <b>Total</b> |                                              | <b><u>7.05</u></b> | <b><u>1.27</u></b> |           |

**Non-aromatic hydrocarbons**

|     |                         |  |       |    |
|-----|-------------------------|--|-------|----|
| 96  | 1-methyl-cyclohexene    |  | 0.03  | 14 |
| 98  | 1,1-diethylcyclopropane |  | 0.003 |    |
| 98  | 1-heptene               |  | 0.09  |    |
| 110 | Z-cyclooctene           |  | 0.20  |    |

---

|     |                                              |       |
|-----|----------------------------------------------|-------|
| 110 | 1,6-octadiene                                | 0.02  |
| 112 | 1-octene                                     | 0.07  |
| 114 | Octane                                       | 0.02  |
| 124 | (1-methylethylidene)-cyclohexane             | 0.02  |
| 124 | (E)-1,3-nonadiene                            | 0.05  |
| 124 | 1-butylcyclopentene                          | 0.05  |
| 124 | 1,8-nonadiene                                | 0.03  |
| 126 | 1-nonene                                     | 0.08  |
| 128 | Nonane                                       | 0.02  |
| 136 | D-limonene                                   | 0.01  |
| 138 | (Z)-cyclodecene                              | 0.08  |
| 138 | 1-butyl-cyclohexene                          | 0.06  |
| 140 | 1-methyl-2-(3-methylpentyl)-<br>cyclopropane | 0.10  |
| 150 | 6-butyl-1,4-cycloheptadiene                  | 0.06  |
| 152 | (4E)-1,4-undecadiene                         | 0.20  |
| 154 | methyl cyclodecane                           | 0.003 |
| 154 | 1-undecene                                   | 0.14  |
| 154 | (E)-4-undecene                               | 0.06  |
| 166 | (E,Z)-2,4-dodecadiene                        | 0.16  |
| 166 | 1-heptyl-cyclopentene                        | 0.09  |
| 166 | (5E,7E)-dodeca-5,7-diene                     | 0.07  |
| 168 | (Z)-3-dodecene                               | 0.17  |
| 180 | 1-octyl-cyclopentene                         | 0.06  |
| 180 | Z-1,6-tridecadiene                           | 0.02  |
| 182 | Z-6-tridecene                                | 0.08  |
| 194 | 1,13-tetradecadiene                          | 0.08  |
| 194 | E-1,9-tetradecadiene                         | 0.05  |
| 196 | 1-octyl-cyclohexane                          | 0.05  |

|              |                                        |             |             |
|--------------|----------------------------------------|-------------|-------------|
| 196          | 2-isohexyl-6-methyl-1-heptene          | 0.01        |             |
| 196          | 1-tetradecene                          |             | 0.13        |
| 210          | 1-(1-methylethyl)-2-nonyl-cyclopropane |             | 0.07        |
| 212          | 2,6,10-trimethyl-dodecane              |             | 0.07        |
| 222          | 1,15-hexadecadiene                     |             | 0.34        |
| 222          | 3-undecyl-cyclopentene                 |             | 0.12        |
| 224          | (Z)-7-hexadecene                       |             | 0.09        |
| 236          | 1-heptadecyne                          |             | 0.06        |
| 236          | 6,9-heptadecadiene                     |             | 0.03        |
| 240          | 3-methyl-hexadecane                    |             | 0.03        |
| 252          | (E)-9-octadecene                       |             | 0.39        |
| 267          | cis-2-methyl-7-octadecene              |             | 0.83        |
| 269          | 3-methyl-octadecane                    |             | 0.12        |
| <b>Total</b> |                                        | <b>0.05</b> | <b>4.41</b> |

#### Non-aromatic nitrogen-containign compounds

|              |                                                                         |  |              |
|--------------|-------------------------------------------------------------------------|--|--------------|
| 250          | 5,10-Diethoxy-2,3,7,8-tetrahydro-1H,6H-dipyrrolo[1,2-a:1',2'-d]pyrazine |  | 0.086        |
| 263          | Oleonitrile                                                             |  | 0.312        |
| 281          | (Z)-9-octadecenamide                                                    |  | 1.341        |
| <b>Total</b> |                                                                         |  | <b>1.739</b> |

#### Aromatic compounds

##### Aromatic hydrocarbons

|     |                                 |      |    |
|-----|---------------------------------|------|----|
| 92  | Toluene                         | 0.39 | 39 |
| 104 | bicyclo[4.2.0]octa-1,3,5-triene | 0.12 |    |
| 106 | 1,3-dimethyl-benzene (m-xylene) | 0.05 |    |



|                                     |                                              |                    |                    |                    |       |
|-------------------------------------|----------------------------------------------|--------------------|--------------------|--------------------|-------|
| <b>106</b>                          | Ethylbenzene                                 |                    |                    | <b>0.10</b>        |       |
| <b>148</b>                          | Pentylbenzene                                |                    |                    | <b>0.11</b>        |       |
| <b><u>Total</u></b>                 |                                              |                    |                    | <b><u>0.77</u></b> |       |
| <b>Aromatic oxygenates (others)</b> |                                              |                    |                    |                    |       |
| <b>132</b>                          | 2,3-dihydro-1H-Inden-1-one                   | 0.02               |                    |                    | 5, 14 |
| <b>132</b>                          | 1,3-dihydro-2H-Inden-1-one                   |                    | 0.03               |                    |       |
| <b>140</b>                          | 2-methoxyresorcinol                          |                    | 0.09               |                    |       |
| <b>146</b>                          | 2,3-dihydro-2-methyl-1H-Inden-1-one          |                    | 0.01               |                    |       |
| <b>150</b>                          | 2,3-dimethyl-benzoic acid                    | 0.03               | 0.06               |                    |       |
| <b>150</b>                          | 4-hydroxy-2-methylacetophenone               | 0.01               |                    |                    | 5     |
| <b>150</b>                          | 4-chromanol                                  |                    | 0.02               |                    |       |
| <b>150</b>                          | 3,4-dimethyl-benzoic acid                    |                    | 0.02               |                    |       |
| <b>154</b>                          | 2,6-dimethoxy-phenol (syringol)              |                    | 0.20               | 0.11               | 5     |
| <b>164</b>                          | 3-allyl-6-methoxyphenol                      |                    | 0.09               |                    |       |
| <b>166</b>                          | 1-(3-Hydroxy-4-methoxyphenyl)ethanone        | 0.21               | 0.10               |                    | 14    |
| <b>168</b>                          | 1,2,4-trimethoxybenzene                      |                    | 0.06               |                    | 5     |
| <b>180</b>                          | 1,2-dimethoxy-4-n-propylbenzene              |                    | 0.03               |                    | 14    |
| <b>180</b>                          | 1-(4-hydroxy-3-methoxyphenyl)-2-propanone    |                    | 0.07               |                    | 14    |
| <b>180</b>                          | 4-methyl-2,5-dimethoxybenzaldehyde           |                    |                    | 0.31               |       |
| <b>182</b>                          | 2-ethoxy-6-(methoxymethyl)phenol             |                    | 0.05               |                    |       |
| <b>210</b>                          | 1-(2,6-dihydroxy-4-methoxyphenyl)-1-butanone |                    | 0.02               |                    |       |
| <b>278</b>                          | mono(2-ethylhexyl) phthalate                 |                    | 0.01               |                    |       |
| <b><u>Total</u></b>                 |                                              | <b><u>0.27</u></b> | <b><u>0.86</u></b> | <b><u>0.42</u></b> |       |

---

**Aldehydes**

|              |                                   |                    |                    |  |       |
|--------------|-----------------------------------|--------------------|--------------------|--|-------|
| 122          | 2-hydroxy-benzaldehyde            | 0.04               |                    |  | 5, 14 |
| 122          | 3-hydroxy-benzaldehyde            | 0.04               |                    |  | 5, 14 |
| 178          | 4-hydroxy-2-methoxycinnamaldehyde |                    | 0.07               |  |       |
| <b>Total</b> |                                   | <b><u>0.08</u></b> | <b><u>0.07</u></b> |  |       |

**Phenols**

|              |                            |                    |                    |                    |           |
|--------------|----------------------------|--------------------|--------------------|--------------------|-----------|
| 94           | Phenol                     | 0.06               | 0.28               | 0.50               | 5, 14, 39 |
| 108          | 4-methyl-phenol (p-cresol) | 0.04               | 0.20               | 0.54               | 5, 14     |
| 108          | 2-methyl-phenol (o-cresol) | 0.03               | 0.22               | 0.12               | 5, 14     |
| 122          | 2,4-dimethyl-phenol        | 0.03               | 0.12               |                    | 5, 14     |
| 122          | 2,3-dimethyl-phenol        | 0.02               |                    |                    | 5         |
| 122          | 3-ethyl-phenol             |                    | 0.17               |                    | 5, 14     |
| 122          | 2,5-dimethyl-phenol        |                    | 0.04               |                    | 5, 39     |
| 122          | 2-ethyl-phenol             |                    | 0.04               |                    | 5, 14     |
| 122          | 4-ethyl-phenol             |                    |                    | 0.11               | 5         |
| 134          | 4-(2-propenyl)-phenol      | 0.09               |                    |                    | 5, 14     |
| 136          | 2-ethyl-6-methyl-phenol    | 0.02               |                    |                    | 5, 14     |
| 136          | 3-ethyl-5-methyl-phenol    | 0.02               |                    |                    | 5, 14     |
| 136          | 2,4,5-trimethyl-phenol     | 0.01               |                    |                    | 5, 14     |
| 136          | 2-ethyl-5-methyl-phenol    |                    | 0.04               |                    | 14        |
| <b>Total</b> |                            | <b><u>0.30</u></b> | <b><u>1.11</u></b> | <b><u>1.27</u></b> |           |

**Benzenediols**

|     |                                |          |      |  |       |
|-----|--------------------------------|----------|------|--|-------|
| 110 | 1,2-benzenediol (catechol)     | 0.22     | 0.22 |  | 5, 14 |
| 110 | 1,3-benzenediol (resorcinol)   | 0.15     |      |  | 5     |
| 110 | 1,4-benzenediol (hydroquinone) | 0.07     | 0.08 |  | 5, 14 |
| 124 | 4-methyl-1,2-benzenediol       | (4- 0.07 | 0.15 |  | 5, 14 |

---

|                                               |                                                     |             |             |           |
|-----------------------------------------------|-----------------------------------------------------|-------------|-------------|-----------|
|                                               | methylcatechol)                                     |             |             |           |
| 124                                           | 3-methylcatechol                                    | 0.04        |             | 5, 14     |
| 124                                           | 2-methylhydroquinone                                |             | 0.04        | 5         |
| 124                                           | 2-methyl-resorcinol                                 |             | 0.03        | 5         |
| 138                                           | 4-ethyl-resorcinol                                  | 0.03        |             | 5, 14     |
| 138                                           | 4,5-dimethylresorcinol                              | 0.06        |             | 5, 14     |
| 138                                           | 4-ethylcatechol                                     | 0.04        |             | 5         |
| 138                                           | 2,5-dimethylhydroquinone                            | 0.19        |             | 5, 14     |
| 152                                           | 4-propyl-1,3-benzenediol<br>(4-propylresorcinol)    | 0.02        |             | 14        |
| 152                                           | 3,4-dihydroxyacetophenone<br>(4-acetylpyrocatechol) |             | 0.02        |           |
| <b>Total</b>                                  |                                                     | <b>0.90</b> | <b>0.54</b> |           |
| <b>Methoxy-, dimethoxy phenol derivatives</b> |                                                     |             |             |           |
| 124                                           | 2-methoxy-phenol (guaiacol)                         | 0.50        | 0.44        | 5, 14, 39 |
| 138                                           | 4-methylguaiacol (creosol)                          | 0.58        |             | 5         |
| 140                                           | 3-methoxy-1,2-benzenediol                           |             | 0.07        |           |
| 152                                           | Vanillin                                            | 0.25        | 0.13        | 5, 14, 39 |
| 152                                           | 4-ethylguaiacol                                     | 0.15        |             | 5, 14, 39 |
| 164                                           | 2-methoxy-5-(1-propenyl)-phenol,<br>(E)-            |             | 0.05        |           |
| 164                                           | 4-allylguaiacol (eugenol)                           |             | 0.01        | 5         |
| 166                                           | 4-propylguaiacol                                    |             | 0.02        | 5         |
| 180                                           | 4-(3-hydroxy-1-propenyl)-2-<br>methoxy-phenol       |             | 0.02        |           |
| 182                                           | 2-ethoxy-6-(methoxymethyl)phenol                    |             | 0.05        |           |
| 194                                           | 2,6-dimethoxy-4-(2-propenyl)-<br>phenol             |             | 0.07        |           |
| 350                                           | 4-methoxyphenyl nonyl succinate                     |             | 0.03        |           |

---

|                                               |                                       |                    |                    |
|-----------------------------------------------|---------------------------------------|--------------------|--------------------|
| <b><u>Total</u></b>                           |                                       | <b><u>1.47</u></b> | <b><u>0.88</u></b> |
| <b>Aromatic nitrogen-containing compounds</b> |                                       |                    |                    |
| <b>117</b>                                    | benzyl nitrile                        |                    | 0.10               |
| <b>117</b>                                    | Indole                                |                    | 0.07               |
| <b>131</b>                                    | Benzenepropanenitrile                 |                    | 0.04               |
| <b>131</b>                                    | 3-methylindolizine                    |                    | 0.16               |
| <b>179</b>                                    | 3,4-dimethylphenyl<br>methylcarbamate |                    | 0.13               |
| <b><u>Total</u></b>                           |                                       |                    | <b><u>0.50</u></b> |

---
